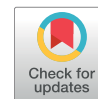

# Dissociation of Glycated Albumin and HbA<sub>1c</sub> Is Associated With a Decline of Glomerular Filtration Rate as Evaluated by Inulin Clearance

*Diabetes Care* 2021;44:e188–e189 | <https://doi.org/10.2337/dc21-1218>

Akihiro Tsuda,<sup>1</sup> Katsuhito Mori,<sup>2</sup> Shinya Nakatani,<sup>1</sup> Yuri Machiba,<sup>1</sup> Hideki Uedono,<sup>1</sup> Masafumi Kurajoh,<sup>1</sup> Shinsuke Yamada,<sup>1</sup> Tomoaki Morioka,<sup>1</sup> Masaaki Inaba,<sup>1</sup> Eiji Ishimura,<sup>3</sup> Junji Uchida,<sup>4</sup> and Masanori Emoto<sup>1,2</sup>

Hemoglobin A<sub>1c</sub> (HbA<sub>1c</sub>), microalbuminuria, and estimated glomerular filtration rate (eGFR) are widely used for assessment of diabetic kidney disease (DKD). However, we have shown that eGFR is inaccurate in DKD (1). Further, HbA<sub>1c</sub> has several limitations as a glycemic marker (2). Guidelines for hemodialysis patients in Japan recommend evaluation of glycemic control using glycated albumin (GA) rather than HbA<sub>1c</sub>, which is affected by conditions such as anemia and renal failure (3). Renal anemia is a common complication in chronic kidney disease (CKD), including in predialysis patients with CKD. Thus, we evaluated the correlations between GFR measured accurately by inulin clearance (C<sub>in</sub>) and the dissociation of GA and HbA<sub>1c</sub> in nondialysis patients with CKD.

The study protocol was approved by the Ethics Committee of Osaka City University Graduate School of Medicine (#3506) as an opt-out study. The study was performed between January 2009 and March 2020 at Osaka City University Hospital.

The subjects were 133 patients (60.6 ± 12.5 years, 66 males) with glycemic disorder. Diagnosis of type 2 diabetes (87

subjects) was based on a history of diabetes or criteria in the “Report of the Expert Committee on the Diagnosis and Classification of Diabetes Mellitus” (4). Prediabetes (46 subjects) was evaluated by a 2-h 75-g oral glucose tolerance test. The subjects were restricted to those with CKD stages 1–4. GFR was evaluated by the gold standard C<sub>in</sub>, determined by the constant input clearance technique with inulin. C<sub>in</sub> was calculated by the U<sub>in</sub>/P<sub>in</sub> method, where U<sub>in</sub> is the urinary inulin concentration, V is the urinary volume, and P<sub>in</sub> is the mean plasma inulin concentration from measurements at the beginning and end of the clearance period. GA was measured by an enzymatic method using a Lucica GA-L kit (Asahi Kasei Pharma Co., Tokyo, Japan).

In single regression analyses (Fig. 1), there were significant positive correlations between GA and HbA<sub>1c</sub> in each stage of CKD evaluated by eGFR (CKD 1,  $r = 0.890$ ,  $P < 0.0001$ , slope 2.470; CKD 2,  $r = 0.825$ ,  $P < 0.0001$ , slope 2.460; CKD 3 or 4,  $r = 0.718$ ,  $P = 0.0004$ , slope 2.208) and by C<sub>in</sub> (CKD 1,  $r = 0.891$ ,  $P < 0.0001$ , slope 2.058; CKD 2,  $r = 0.866$ ,  $P < 0.0001$ , slope 2.447; CKD 3 or 4,  $r = 0.830$ ,  $P < 0.0001$ , slope 3.138). In

advanced CKD stages evaluated by C<sub>in</sub> ( $P = 0.0024$ ) but not by eGFR ( $P = 0.6495$ ), the regression slopes for GA and HbA<sub>1c</sub> were significantly steeper, as evaluated by analyses of covariance. The GA/HbA<sub>1c</sub> ratio was significantly negatively correlated with eGFR ( $r = -0.189$ ,  $P = 0.0302$ ) and C<sub>in</sub> ( $r = 0.408$ ,  $P < 0.0001$ ).

In multiple regression analysis using a model including C<sub>in</sub> or eGFR as an independent variable, C<sub>in</sub> ( $\beta = -0.233$ ,  $P = 0.0097$ ), but not eGFR ( $\beta = -0.007$ ,  $P = 0.9415$ ), was significantly associated with the GA/HbA<sub>1c</sub> ratio after adjustments for other clinical parameters. Association of the GA/HbA<sub>1c</sub> and eGFR/C<sub>in</sub> ratios was also evaluated, as eGFR may be inaccurate in patients with DKD. eGFR/C<sub>in</sub> ( $\beta = -0.227$ ,  $P = 0.0023$ ) was significantly associated with GA/HbA<sub>1c</sub> after adjustments for other clinical parameters.

In this study, the GA/HbA<sub>1c</sub> ratio was higher in advanced CKD stages evaluated by C<sub>in</sub> but not by eGFR, which is used in daily practice. Further, eGFR/C<sub>in</sub> ratios were significantly associated with GA/HbA<sub>1c</sub> ratios. The prevalence of anemia increases even in the early stage of kidney failure, particularly in diabetes (5).

<sup>1</sup>Department of Metabolism, Endocrinology and Molecular Medicine, Osaka City University Graduate School of Medicine, Osaka, Japan

<sup>2</sup>Department of Nephrology, Osaka City University Graduate School of Medicine, Osaka, Japan

<sup>3</sup>Department of Nephrology, Meijibashi Hospital, Osaka, Japan

<sup>4</sup>Department of Urology, Osaka City University Graduate School of Medicine, Osaka, Japan

Corresponding author: Akihiro Tsuda, [naranotsudadesu@infoseek.jp](mailto:naranotsudadesu@infoseek.jp)

Received 11 June 2021 and accepted 30 July 2021

© 2021 by the American Diabetes Association. Readers may use this article as long as the work is properly cited, the use is educational and not for profit, and the work is not altered. More information is available at <https://www.diabetesjournals.org/content/license>.

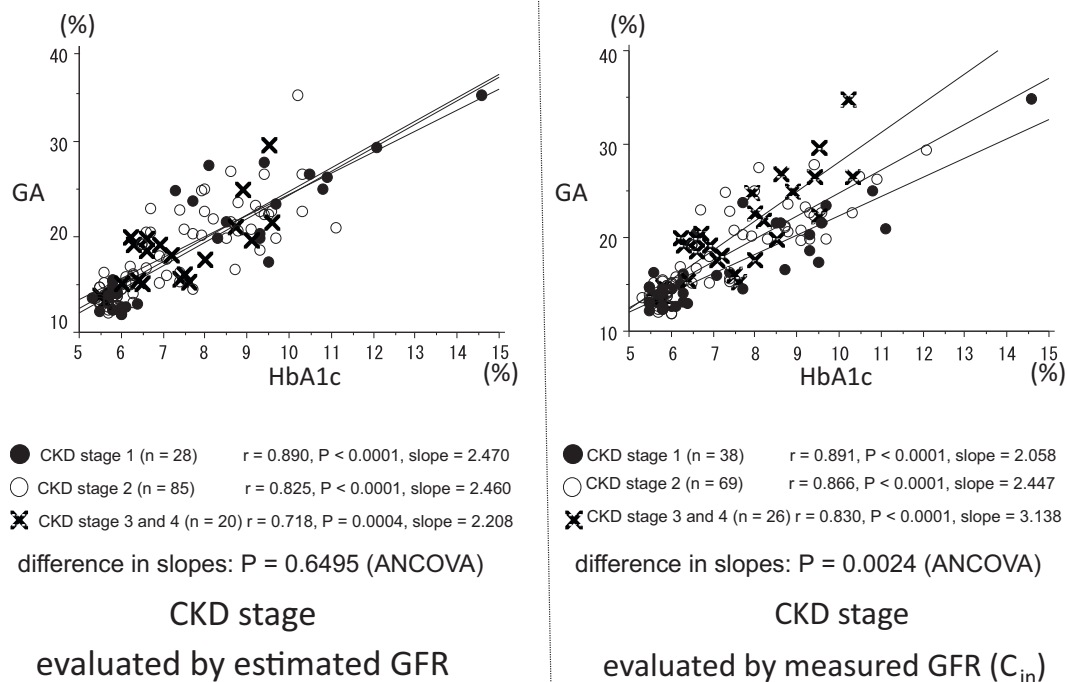

**Figure 1**—Relationship between glycated albumin (GA) and hemoglobin A1c ( $HbA_{1c}$ ) in CKD stages evaluated by estimated GFR (left) and measured GFR (inulin clearance:  $C_{in}$ ) (right).

Fujita et al. (5) found that low erythropoietin levels, which are common even in patients without CKD, predict a rapid decline of kidney function in patients with type 2 diabetes with anemia. Thus, the diathesis of renal anemia in diabetes may exist even before actualization of renal dysfunction. Evaluation of kidney function by eGFR calculation in patients with diabetes is less accurate than in subjects without diabetes (1). Thus, kidney injury and/or erythropoietin deficiency might already be present in patients with seemingly normal kidney function evaluated by a relatively incorrect eGFR, and dissociation of GA and  $HbA_{1c}$  induced by reduction of GFR may not be detected by evaluation with eGFR. We consider that  $HbA_{1c}$  is inaccurate and that GA may be a better marker of glycemic control in predialysis subjects as well as in dialysis patients.

This study has some limitations. First, it was performed in a relatively small

number of patients. Second, we did not measure erythropoietin and iron metabolism markers as causes of lower hemoglobin because no cases warranted treatment for this condition. Finally, we only included Japanese subjects.

In conclusion, GA and  $HbA_{1c}$  are dissociated by GFR reduction in patients with glycemic disorder, and eGFR and  $HbA_{1c}$  may not provide an accurate measure of the risk of DKD. Thus, care is needed in evaluating glycemic control using  $HbA_{1c}$  in patients with kidney dysfunction.

**Duality of Interest.** No potential conflicts of interest relevant to this article were reported.

**Author Contributions.** A.T. analyzed the data and wrote the manuscript. E.I. contributed to writing the manuscript. A.T., K.M., S.N., Y.M., H.U., M.K., S.Y., T.M., M.I., J.U., and M.E. contributed to the discussion and reviewed the manuscript. A.T. is the guarantor of this work and, as such, had full access to

all the data in the study and takes responsibility for the integrity of the data and the accuracy of the data analysis.

## References

1. Tsuda A, Ishimura E, Ohno Y, et al. Poor glycemic control is a major factor in the overestimation of glomerular filtration rate in diabetic patients. *Diabetes Care* 2014;37:596–603
2. Nayak AU, Singh BM, Dunmore SJ. Potential clinical error arising from use of  $HbA_{1c}$  in diabetes: effects of the glycation gap. *Endocr Rev* 2019;40:988–999
3. Nakao T, Inaba M, Abe M, et al.; Japanese Society for Dialysis Therapy. Best practice for diabetic patients on hemodialysis 2012. *Ther Apher Dial* 2015;19(Suppl. 1):40–66
4. Expert Committee on the Diagnosis and Classification of Diabetes Mellitus. Report of the Expert Committee on the Diagnosis and Classification of Diabetes Mellitus. *Diabetes Care* 1997;20:1183–1197
5. Fujita Y, Doi Y, Hamano T, et al. Low erythropoietin levels predict faster renal function decline in diabetic patients with anemia: a prospective cohort study. *Sci Rep* 2019;9:14871
